# Supplementary material for: Interfacial growth of metal–organic framework on carboxyl-functionalized carbon nanotubes for efficient dye adsorption and separation
Source: Royal Society of Chemistry journal article supplement (doi:10.1039/d0ay01249a), 2020-01-01
Supplement: d0ay01249a1.pdf [file d0ay01249a1.pdf]

# Interfacial Growth of Metal-Organic Framework on Carboxyl-Functionalized Carbon Nanotube for Efficient Dye Adsorption and Separation

Xinxin Sang\*, Qijun Zha, Xiangdao Nie, Dongyin Liu, Yansong Guo, Xianbin Shi, Caihua Ni\*

## Experimental Section

### Materials

Zirconium tetrachloride, 2-amino-1,4-benzenedicarboxylic acid ( $H_2BDC-NH_2$ ), N,N-dimethyl formamide (DMF), methyl orange (MO), methylene blue (MB) and chloroform were supplied from Sinopharm Chemical Reagent Co., Ltd. All of the chemicals were used as-received without any purification. CNTs-COOH (-COOH content of 3.86%) was purchased from Beijing DK Nanotechnology Co., Ltd.

### Characterizations

Powder X-ray diffraction (PXRD) patterns are collected from a BRUKER D8 ADVANCE X-ray diffractometer in the range of  $2\theta = 5-50^\circ$  by step scanning. The size and morphology of composites are determined by a transmission electron microscope (TEM, JEM-2100 plus) and a scanning electron microscope (SEM, Hitachi S4800). Fourier transform infrared spectrum (FT-IR) measurement is performed on a PerkinElmer FT-IR C94349 spectrometer in the range of  $650-4000\text{ cm}^{-1}$ . Thermogravimetric analysis (TGA) is carried out under nitrogen atmosphere ( $20\text{ mL min}^{-1}$ ) from  $50-700\text{ }^\circ\text{C}$  using PerkinElmer Pyris 1 at a rate of  $20\text{ }^\circ\text{C min}^{-1}$ . X-ray photoelectron spectroscopy (XPS) is obtained from an ESCALab220i-XL electron spectrometer with  $300\text{W AlK}\alpha$  radiation. C1s line at  $284.8\text{ eV}$  from adventitious carbon is used as the binding energy reference.  $N_2$  adsorption-desorption isotherms at  $77\text{ K}$  from a Quadrasorb SI-MP system is applied for porosity characterization. Prior to analysis, the samples are activated at  $150\text{ }^\circ\text{C}$  for  $24\text{ h}$  on a Micrometrics Smart VacPrep System. Zeta potential is measured on a Brookhaven ZetaPALS instrument.

**Table S1** Porous properties of CNTs-COOH, UiO-66-NH<sub>2</sub> and their composites

| Samples                     | BET surface area<br>(m <sup>2</sup> g <sup>-1</sup> ) | Total pore volume<br>(cm <sup>3</sup> g <sup>-1</sup> ) | Langmuir |
|-----------------------------|-------------------------------------------------------|---------------------------------------------------------|----------|
| CNTs-COOH                   | 109.4                                                 | 0.329                                                   | --       |
| UiO-66-NH <sub>2</sub>      | 572.3                                                 | 0.302                                                   | 737.6    |
| CNTs/UiO-66-NH <sub>2</sub> | 518.0                                                 | 0.223                                                   | 601.8    |
| CNTs-CONH-UiO-66            | 539.3                                                 | 0.311                                                   | 735.0    |
| CNTs@UiO-66-NH <sub>2</sub> | 692.4                                                 | 0.359                                                   | 873.0    |

**Table S2** Contribution of nitrogen peaks resulting from the fitting of Gaussian components to N 1s photoelectron spectra for adsorbents

| Adsorbents                  | Peak area (%)         |                                    |
|-----------------------------|-----------------------|------------------------------------|
|                             | PhNH <sub>2</sub> N1s | PhNH <sub>3</sub> <sup>+</sup> N1s |
| UiO-66-NH <sub>2</sub>      | 69.79                 | 30.21                              |
| CNTs@UiO-66-NH <sub>2</sub> | 37.60                 | 62.40                              |

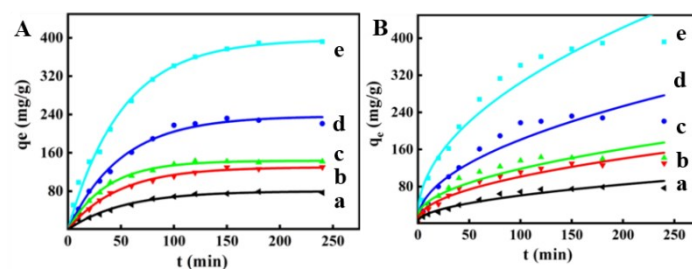**Fig. S1** (A) Fitting of pseudo-first-order kinetic model (B) Fitting of pseudo-second-order kinetic model for different adsorbents: (a) CNTs-COOH, (b) CNTs/UiO-66-NH<sub>2</sub>, (c) UiO-66-NH<sub>2</sub> (d) CNTs-CONH-UiO-66, (e) CNTs@UiO-66-NH<sub>2</sub>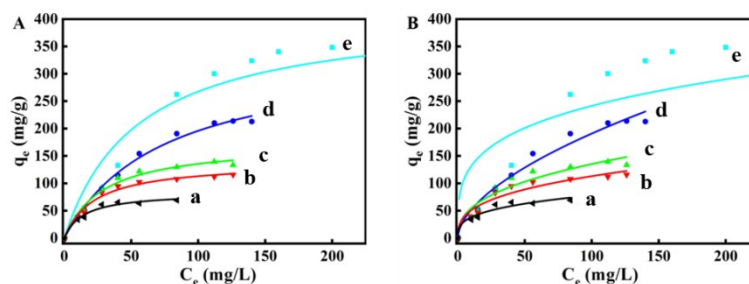**Fig. S2** Fittings of (A) Langmuir and (B) Freundlich kinetic models for different adsorbents: (a) CNTs-COOH, (b) CNTs/UiO-66-NH<sub>2</sub>, (c) UiO-66-NH<sub>2</sub> (d) CNTs-CONH-UiO-66, (e) CNTs@UiO-66-NH<sub>2</sub>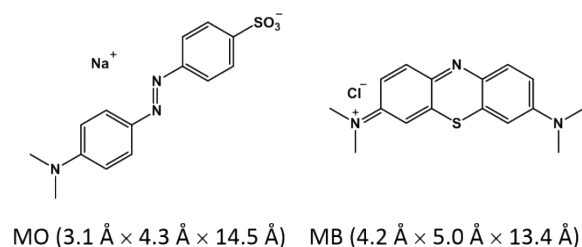

**Scheme S1.** Schematic drawing of dyes.

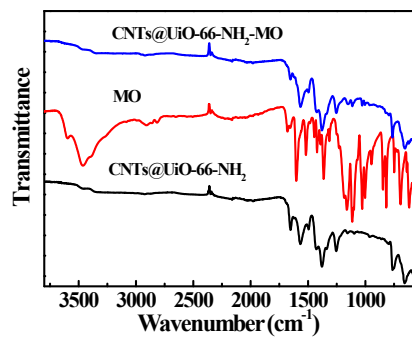

**Fig. S3** FTIR spectra of CNTs@UiO-66-NH<sub>2</sub> before and after adsorption of MO.
